# Supplementary material
Source: Springer Nature journal article supplement (https://www.springermedizin.de/resource/supplementary/13058_2014_3405_MOESM3_ESM.pdf/9704116)
Supplement: MOESM3 [file 9704116]

Tumour samples with genomics and HR defect-targeting drug response data

Construction of genomic signature predictive of HR defect-targeting drug sensitivity

Construction of mutational/transcriptomic signature predictive of HR defect-targeting drug resistance given genomic scar-predicted drug sensitivity

**INTEGRATED PREDICTIVE BIOMARKER**

*Low PPV & High NPV*

Genomic Scar Biomarker

PREDICTED NON-RESPONDERS      PREDICTED RESPONDERS

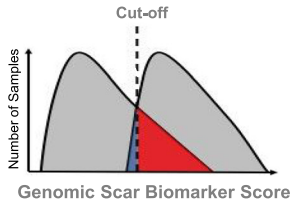

*High PPV & High NPV*

Resistance-Refined Biomarker

PREDICTED NON-RESPONDERS      PREDICTED RESPONDERS

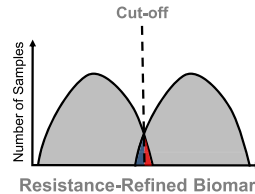

■ False Positives  
■ False Negatives

Establishment of an optimal cut-off to predict HR defect-targeting drug response as a binary outcome **with high NPV**

Establishment of an optimal cut-off to predict HR defect-targeting drug response as a binary outcome **with improved PPV**

PREDICTED NON-RESPONDERS

PREDICTED RESPONDERS

PREDICTED NON-RESPONDERS

PREDICTED RESPONDERS

No treatment with HR defect-targeting drug therapy

Treatment with HR defect-targeting drug therapy
